Anesthesiology  
76:659, 1992

## Finger Blood Pressure

*To the Editor:*—I congratulate Gibbs and colleagues<sup>1</sup> for their timely evaluation of the Finapres<sup>®</sup> to measure accurately mean arterial pressure and for the form in which they chose to present the results. In addition to the bias and accuracy of the measurements, they show the frequency, magnitude, and duration of the discrepancies between the Finapres<sup>®</sup> and radial artery mean arterial pressure measurements. Had these researchers used regression analysis or calculated the correlation coefficient between the two sets of measurements, they would have reached the opposite conclusions, as have others.<sup>2</sup> However, the statement, "It is hoped that future improvements in engineering design will lead to greater reliability of FIN measurements" is overly optimistic. The idea of measuring blood pressure accurately and noninvasively and in a finger is very alluring; unfortunately, it has been known for some time that finger blood flow and pulse pressure are regulated by sympathetic vasoconstriction.<sup>3</sup> Nijboer and Dorlas,<sup>4</sup> using finger and ear plethysmograms in anesthetized patients, found that whereas the pulse pressure on the pinna of the ear was minimally affected by sympathetic stimulation (laryngoscopy, surgical stimulation, etc.), pulse pressure on the finger was influenced greatly by such events. Therefore, although the finger could be a good place to measure peripheral vascular response to sympathetic stimulation, it is not a good place to assess the general state of the circulation.

Do we need noninvasive measurement of blood pressure in dangerously sick patients? If we do, the carotid, femoral, or radial artery areas should be used. Technically, it should not be difficult to develop the proper transducer; however, its placement will require great attention to detail, a rare commodity in clinical situations.

ALFREDO L. PAUCA, M.D.  
Associate Professor of Anesthesia  
Bowman Gray School of Medicine  
Wake Forest University Medical Center  
Medical Center Boulevard  
Winston-Salem, North Carolina 27157-1009

## REFERENCES

1. Gibbs NM, Larach DR, Derr JA: The accuracy of Finapres<sup>®</sup> non-invasive mean arterial pressure measurement in anesthetized patients. *ANESTHESIOLOGY* 74:647-652, 1991
2. Imholz BPM, van Montfrans GA, Settels JJ, van der Hoeven GMA, Karemaker GM, Wieling W: Continuous non-invasive blood pressure monitoring: Reliability of the Finapres device during the Valsalva manoeuvre. *Cardiovasc Res* 22:390-397, 1988
3. Shepherd JT: Physiology of the Circulation in Human Limbs in Health and Disease. Philadelphia, WB Saunders Company, 1963, pp 9-17
4. Nijboer JA, Dorlas JC: Comparison of plethysmograms taken from finger and pinna during anaesthesia. *Br J Anaesth* 57:531-534, 1985

(Accepted for publication December 26, 1991.)

Anesthesiology  
76:659-660, 1992

## Inconsistency of Data Linking the Ryanodine Receptor and Malignant Hyperthermia Genes

*To the Editor:*—We read the article by MacKenzie and colleagues<sup>1</sup> with great interest. However, we found the rationale behind the evidence for linkage between the malignant hyperthermia (MH) and ryanodine receptor (RYP) genes tortuous, if not entirely circular.

The original paper by MacLennan *et al.*<sup>2</sup> suggesting the RYP gene as a candidate gene for MH produced a lod score of 4.2. This degree of linkage was obtained using *in vitro* contracture test (IVCT) thresholds for the phenotyping of MH susceptibility similar to those that produced no linkage with the RYP gene in the pedigree described by MacKenzie *et al.* If the revisions to the threshold values of the IVCT suggested by MacKenzie *et al.* were applied to the patients in the paper by MacLennan *et al.*, it is difficult to imagine that linkage between the RYP gene and MH could still be demonstrated.

From our experience of testing more than 2,300 patients for MH susceptibility, we believe that no conclusions regarding the linkage of MH and the RYP gene can or should be made from the data presented by MacLennan *et al.* or MacKenzie *et al.* This view is based on their use of the combined halothane and caffeine test with its high false positive rate (11% in our unpublished series; see also the editorial by Levitt *et al.*<sup>3</sup>) and, in the case of MacKenzie *et al.*, by the use of a 1% halothane test, which lacks the sensitivity of tests using 2% or 3% halothane.

Great care must be taken in selecting those families suitable for

genetic studies, and the papers by these Canadian groups highlight the need for the full reporting of IVCT methods and results (*i.e.*, the degree of muscle contraction in response to the stated concentration of caffeine and of halothane) in all studies investigating the genetics of MH. Also, because of the likelihood that MH is a heterogeneous disorder,<sup>3</sup> data from more than one family should not be pooled without good reason.

DR. P. M. HOPKINS  
Lecturer in Anaesthesia  
DR. F. R. ELLIS  
Reader in Anaesthesia  
DR. P. J. HALSALL  
Clinical Assistant  
Malignant Hyperthermia Unit  
University Department of Anaesthesia  
The University of Leeds  
St. James's University Hospital  
Beckett Street  
Leeds LS9 7TF, United Kingdom

## REFERENCES

1. MacKenzie AE, Allen G, Lahey D, Crossan M, Nolan K, Mettler G, Worton RG, MacLennan DH, Korneluk R: A comparison of the caffeine halothane muscle contracture test with the molecular genetic diagnosis of malignant hyperthermia. *ANESTHESIOLOGY* 75:4-8, 1991
2. MacLennan DH, Duff C, Zorzato F, Fujii J, Phillips M, Korneluk

RG, Frodis W, Britt BA, Worton RG: Ryanodine receptor gene is a candidate for predisposition to malignant hyperthermia. *Nature* 343:559-561, 1990

3. Levitt RC, Meyers D, Fletcher JE, Rosenberg H: Molecular genetics and malignant hyperthermia. *ANESTHESIOLOGY* 75:1-3, 1991

(Accepted for publication December 27, 1991.)

Anesthesiology  
76:660-661, 1992

*In Reply:*—In our recent publication,<sup>1</sup> the results of a molecular genetic analysis of a large malignant hyperthermia (MH) kindred were reported. It was demonstrated that complete linkage between inheritance of a restriction fragment length polymorphism (RFLP) in the ryanodine receptor (RYR1) gene and the MH phenotype was contingent upon alteration of the thresholds defining positive *in vitro* contracture tests (IVCT). Hopkins *et al.* have speculated that if these altered thresholds were applied to the data in an earlier publication first reporting RYR1-MH linkage,<sup>2</sup> such linkage would not have been demonstrated. We believe that Hopkins *et al.* are correct in their assertion. However, we are uncertain what implications we are to derive from this point.

In the study reported in reference 1, the IVCTs were carried out in one laboratory, whereas in the reference 2 study, they were performed in another. Potential false positive diagnoses of probable normal individuals were identified in reference 1 but not in reference 2. No problem was noted in the diagnoses of MH individuals in either paper. The origin of the false positives may lie with normal variations of contracture response in the family in reference 1, or it may be a laboratory-specific phenomenon. Regardless of the origin, we are unclear how the presence of false positivity in some but not all MH kindreds renders the evidence for RYR1-MH linkage invalid. Nonetheless, Hopkins *et al.* go on to state that based on their experience in testing 2,300 patients for MH susceptibility (presumably IVCTs), no conclusions regarding the linkage of MH and RYR1 can or should be made from the data in references 1 and 2. It is not readily apparent why performing a physiologic assay (albeit 2,300 times) is helpful in the assessment of the accuracy of what is primarily a genetic test. We believe that determination of the validity of linkage for each MH family can most readily be effected by collecting IVCT data and then assaying for cosegregation of positive IVCT results with one of the many RYR1-RFLP alleles that have been defined. We also believe that the *a priori* rejection of RYR1-MH linkage because of a postulated methodologic flaw is unwarranted. Should such weaknesses exist, they will emerge with the analysis of kindreds large enough to support or refute genetic linkage, such as that studied in reference 1.

Assertions for or against RYR1-MH linkage will ultimately be borne out or refuted by additional studies in this area. In this regard, a transcriptionally significant RYR1 mutation has recently been linked to MH in five breeds of swine,<sup>3</sup> resulting in a lod score of 102 with a recombinant fraction of 0.0.<sup>4</sup> The reappearance of the mutation across the species barrier in a human family in whom it was observed to cosegregate with MH<sup>5</sup> makes almost incontestable the conclusion that mutations in the RYR1 gene cause at least some forms of MH in humans.

We do not believe, however, that all inherited forms of human MH are based in the RYR1 gene. MH has been associated with a variety of other neuromuscular diseases,<sup>6</sup> of which myotonic dystrophy (separated from RYR1 on chromosome 19<sup>7</sup>) and Duchenne muscular dystrophy, on the X chromosome, are but two examples. Moreover, absence of linkage of RYR1 to MH has been recently observed in some

MH kindreds.<sup>8,\*</sup> The common causal feature in MH is undoubtedly lack of regulation of calcium within skeletal muscle cells. This might result from a series of mutations in a series of proteins in the sarco-plasmic or endoplasmic reticulum, the plasma membrane, or other organelles whose common feature is to diminish the ability of muscle cells to regulate intracellular calcium. Since there is now evidence of at least one RYR1 mutation causing MH,<sup>5</sup> and since there is a physiologic rationale for the involvement of defects in the ryanodine receptor in MH, in those family cases where RYR1-MH linkage cannot be established, research should be directed toward determination of whether the IVCT is in error or whether linkage indeed lies with an alternate gene.

\* Deufel T: Personal communication.

ALEX MACKENZIE, M.D., PH.D.

Assistant Professor

Division of Genetics

Department of Paediatrics

University of Ottawa

Children's Hospital of Eastern Ontario

401 Smyth Road

Ottawa, Ontario, Canada K1H 8L1

DAVID H. MACLENNAN, PH.D.

J. W. Biles Professor of Medical Research

Banting and Best Department of Medical Research

University of Toronto

C. H. Best Institute

112 College Street

Toronto, Ontario, Canada M5G 1L6

## REFERENCES

1. MacKenzie AE, Allen G, Lahey D, Crossan ML, Nolan K, Mettler G, Worton RG, MacLennan DH, Korneluk R: A Comparison of the caffeine halothane muscle contracture test with the molecular genetic diagnosis of malignant hyperthermia. *ANESTHESIOLOGY* 75:4-8, 1991
2. MacLennan DH, Duff C, Zorzato F, Fujii J, Phillips M, Korneluk RG, Frodis W, Britt BA, Worton RG: Ryanodine receptor gene is a candidate for predisposition to malignant hyperthermia. *Nature* 343:559-561, 1990
3. Fujii J, Otsu LK, Zorzato F, De Leon S, Khanna VK, Weiler J, O'Brien PJ, MacLennan DH: Identification of a mutation in the porcine ryanodine receptor that is associated with malignant hyperthermia. *Science* 253:448-451, 1991
